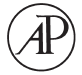

## Erratum

ICES Journal of Marine Science, 56: 779–790. 2000

Using smoothers for comprehensive assessments of contaminant time series in marine biota

R. J. Fryer, and M. D. Nicholson

It is regretted that the smoothing matrix in Appendix 1 in the above article should be:

$$S = \begin{bmatrix} 0.569 & 0.388 & 0.199 & 0.028 & -0.077 & -0.082 & -0.025 & 0 & 0 & . & . & 0 \\ 0.383 & 0.300 & 0.210 & 0.111 & 0.025 & -0.018 & -0.010 & 0 & 0 & . & . & 0 \\ 0.209 & 0.223 & 0.202 & 0.172 & 0.123 & 0.060 & 0.011 & 0 & 0 & . & . & 0 \\ 0.042 & 0.145 & 0.206 & 0.216 & 0.206 & 0.145 & 0.042 & 0 & 0 & . & . & 0 \\ 0 & 0.042 & 0.145 & 0.206 & 0.216 & 0.206 & 0.145 & 0.042 & 0 & . & . & 0 \\ . & . & . & . & . & . & . & . & . & . & . & . \\ . & . & . & . & . & . & . & . & . & . & . & . \\ 0 & . & . & 0 & 0.042 & 0.145 & 0.206 & 0.216 & 0.206 & 0.145 & 0.042 & 0 \\ 0 & . & . & 0 & 0 & 0.042 & 0.145 & 0.206 & 0.216 & 0.206 & 0.145 & 0.042 \\ 0 & . & . & 0 & 0 & 0.011 & 0.060 & 0.123 & 0.172 & 0.202 & 0.223 & 0.209 \\ 0 & . & . & 0 & 0 & -0.010 & -0.018 & 0.025 & 0.111 & 0.210 & 0.300 & 0.383 \\ 0 & . & . & 0 & 0 & -0.025 & -0.082 & -0.077 & 0.028 & 0.199 & 0.388 & 0.569 \end{bmatrix}$$
